# Supplementary material
Source: publisher figshare collection journal article supplement (https://gsajournals.figshare.com/articles/dataset/_/11278271)
Supplement: Supplementary file 1 [file 1]

## SUPPLEMENTAL MATERIAL

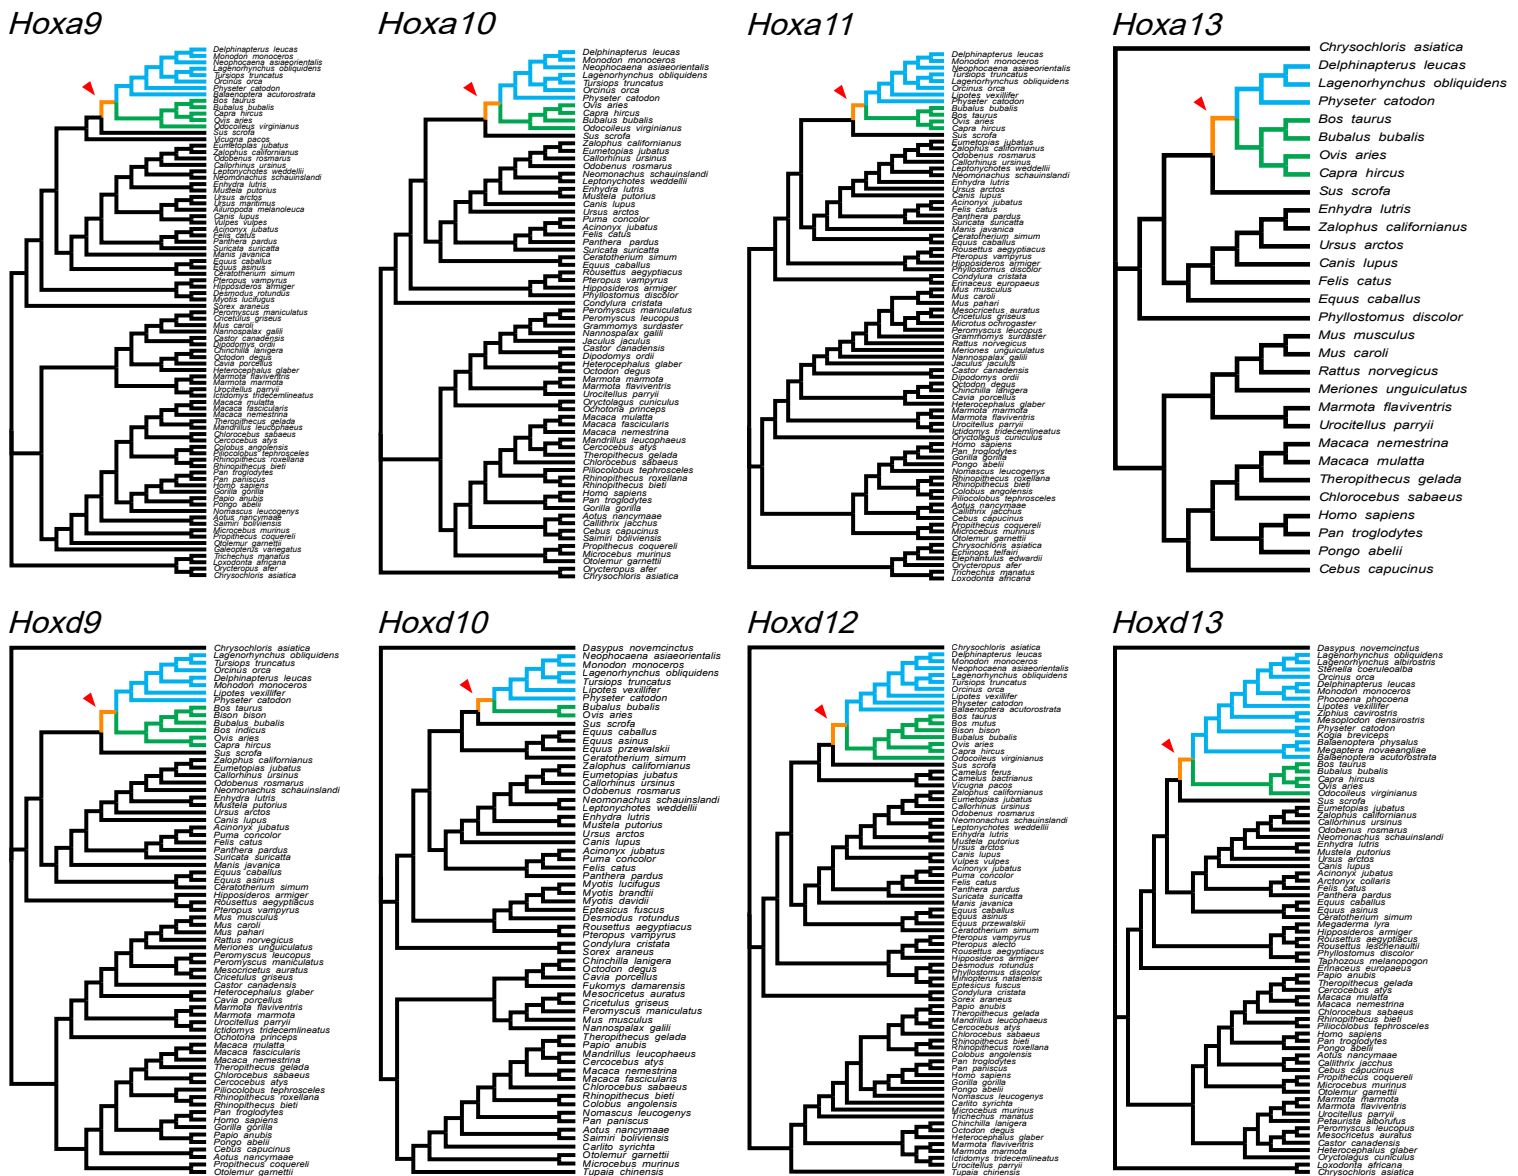

**Figure S1** Species trees for the evolutionary analyses of other 5' *HoxA* and *HoxD* genes. Cetacean branches are shown in blue, ruminants in green, and the ancestor of Cetuminantia in orange. The foreground branch tested in the two-ratio model is indicated by the red arrow.

**Table S1** *Hoxd11* sequences from 53 mammalian species analyzed in this study

| Scientific name                   | Common name                   | Order           | GenBank accession No. |
|-----------------------------------|-------------------------------|-----------------|-----------------------|
| <i>Lagenorhynchus acutus</i>      | Atlantic white-sided dolphin  | Cetartiodactyla | KU842356 <sup>†</sup> |
| <i>Lagenorhynchus obliquidens</i> | Pacific white-sided dolphin   | Cetartiodactyla | XM_027127561          |
| <i>Tursiops truncatus</i>         | Atlantic bottle-nosed dolphin | Cetartiodactyla | XM_019923102          |
| <i>Delphinapterus leucas</i>      | Beluga whale                  | Cetartiodactyla | XM_022570088          |
| <i>Lipotes vexillifer</i>         | Baiji                         | Cetartiodactyla | XM_007451091          |
| <i>Mesoplodon densirostris</i>    | Blainville's beaked whale     | Cetartiodactyla | KU842358 <sup>†</sup> |
| <i>Mesoplodon bidens</i>          | Sowerby's beaked whale        | Cetartiodactyla | KU842360 <sup>†</sup> |
| <i>Hyperoodon ampullatus</i>      | Northern bottlenose whale     | Cetartiodactyla | KU842357 <sup>†</sup> |
| <i>Kogia breviceps</i>            | Pygmy sperm whale             | Cetartiodactyla | KU842359 <sup>†</sup> |
| <i>Physeter catodon</i>           | Sperm whale                   | Cetartiodactyla | XM_028479389          |
| <i>Megaptera novaeangliae</i>     | Humpback whale                | Cetartiodactyla | KU842353 <sup>†</sup> |
| <i>Balaenoptera acutorostrata</i> | Minke whale                   | Cetartiodactyla | KU842355 <sup>†</sup> |
| <i>Balaenoptera physalus</i>      | Fin whale                     | Cetartiodactyla | KU842354 <sup>†</sup> |
| <i>Bos indicus</i>                | Zebu                          | Cetartiodactyla | XM_019970465          |
| <i>Bos taurus</i>                 | Cow                           | Cetartiodactyla | NM_001206324          |
| <i>Bubalus bubalis</i>            | Domestic water buffalo        | Cetartiodactyla | XM_025274446          |
| <i>Capra hircus</i>               | Goat                          | Cetartiodactyla | KU842361 <sup>†</sup> |
| <i>Ovis aries</i>                 | Sheep                         | Cetartiodactyla | XM_012143655          |
| <i>Sus scrofa</i>                 | Pig                           | Cetartiodactyla | KU842362 <sup>†</sup> |
| <i>Equus caballus</i>             | Horse                         | Perissodactyla  | XM_023622041          |
| <i>Equus asinus</i>               | Donkey                        | Perissodactyla  | KU842363 <sup>†</sup> |
| <i>Enhydra lutris</i>             | Sea otter                     | Carnivora       | XM_022500652          |
| <i>Eumetopias jubatus</i>         | Steller sea lion              | Carnivora       | XM_028121142          |
| <i>Zalophus californianus</i>     | California sealion            | Carnivora       | XM_027588962          |
| <i>Callorhinus ursinus</i>        | Northern fur seal             | Carnivora       | XM_025849734          |
| <i>Ursus arctos</i>               | Brown bear                    | Carnivora       | XM_026492502          |
| <i>Canis lupus</i>                | Dog                           | Carnivora       | XM_014110871          |
| <i>Acinonyx jubatus</i>           | Cheetah                       | Carnivora       | XM_027055446          |
| <i>Felis catus</i>                | Cat                           | Carnivora       | XM_023259477          |
| <i>Panthera pardus</i>            | Leopard                       | Carnivora       | XM_019460318          |
| <i>Rousettus aegyptiacus</i>      | Egyptian fruit bat            | Chiroptera      | XM_016135227          |
| <i>Hipposideros armiger</i>       | Great leaf-nosed bat          | Chiroptera      | KU842364 <sup>†</sup> |
| <i>Theropithecus gelada</i>       | Gelada baboon                 | Primates        | XM_025404734          |
| <i>Macaca mulatta</i>             | Rhesus macaque                | Primates        | XM_028830867          |
| <i>Chlorocebus sabaeus</i>        | Vervet monkey                 | Primates        | XM_007965427          |
| <i>Ptilocolobus tephrosceles</i>  | Ugandan red Colobus           | Primates        | XM_023212447          |
| <i>Pan troglodytes</i>            | Chimpanzee                    | Primates        | XM_012143655          |
| <i>Homo sapiens</i>               | Human                         | Primates        | NM_021192             |
| <i>Cebus capucinus</i>            | White-faced capuchin          | Primates        | XM_017538277          |
| <i>Microcebus murinus</i>         | Gray mouse lemur              | Rodentia        | XM_012753436          |
| <i>Propithecus coquereli</i>      | Coquerel's sifaka             | Rodentia        | XM_012650720          |
| <i>Urocitellus parryi</i>         | Arctic ground squirrel        | Rodentia        | XM_026405647          |
| <i>Marmota flaviventris</i>       | Yellow-bellied marmot         | Rodentia        | XM_027946088          |
| <i>Nannospalax galili</i>         | Nannospalax ehrenbergi galili | Rodentia        | XM_008855308          |
| <i>Peromyscus leucopus</i>        | White-footed mouse            | Rodentia        | XM_028880580          |
| <i>Microtus ochrogaster</i>       | Prairie vole                  | Rodentia        | XM_005346592          |
| <i>Grammomys surdaster</i>        | Thicket rat                   | Rodentia        | XM_028763085          |
| <i>Mus pahari</i>                 | Gairdner's shrew-mouse        | Rodentia        | XM_021194688          |
| <i>Mus musculus</i>               | Mouse                         | Rodentia        | NM_008273             |
| <i>Mus caroli</i>                 | Ryukyu mouse                  | Rodentia        | XM_021180939          |
| <i>Oryctolagus cuniculus</i>      | Rabbit                        | Lagomorpha      | NM_001206421          |
| <i>Ochotona princeps</i>          | American pika                 | Lagomorpha      | XM_004577034          |
| <i>Chrysochloris asiatica</i>     | Cape golden mole              | Afrosoricida    | XM_006866667          |

<sup>†</sup>New sequences in this study.
